# Supplementary material for: New Hepatitis E Virus Genotype in Camels, the Middle East
Source: PubMed Central journal article supplement (PMC4036782; doi:10.3201/eid2006.140140), 2014-06
Supplement: 14-0140-Techapp-s1.pdf [file 14-0140-Techapp-s1.pdf]

# New Hepatitis E Virus Genotype in Camels, the Middle East

## Technical Appendix

Technical Appendix Table. Comparison of nucleotide and deduced amino acid sequence identities of DcHEV and other genotypes of HEV

| HEV genotypes/strains (GenBank accession no.)      | DcHEV-178C (KJ496143)   |      |      |      |                         |      |      |
|----------------------------------------------------|-------------------------|------|------|------|-------------------------|------|------|
|                                                    | Nucleotide identity (%) |      |      |      | Amino acid identity (%) |      |      |
|                                                    | Entire genome           | ORF1 | ORF2 | ORF3 | ORF1                    | ORF2 | ORF3 |
| DcHEV-180C (KJ496144)                              | 86.1                    | 85.0 | 88.5 | 94.7 | 94.9                    | 98.0 | 94.7 |
| HEV1 (L08816)                                      | 74.2                    | 72.6 | 79.3 | 86.1 | 82.1                    | 89.4 | 83.3 |
| HEV2 (M74506)*                                     | 73.7                    | 72.4 | 78.5 | 85.2 | 81.8                    | 88.6 | 79.8 |
| HEV3                                               |                         |      |      |      |                         |      |      |
| Human HEV (FJ653660)                               | 75.4                    | 74.3 | 79.3 | 85.4 | 87.2                    | 91.1 | 78.8 |
| Mongoose HEV (AB591734)                            | 75.8                    | 74.4 | 79.9 | 86.0 | 86.5                    | 90.9 | 79.6 |
| Deer HEV (AB189071)                                | 76.1                    | 75.4 | 78.9 | 85.4 | 86.9                    | 90.8 | 77.9 |
| Rabbit HEV (FJ906895)                              | 74.1                    | 72.3 | 78.6 | 83.3 | 83.2                    | 88.6 | 76.1 |
| HEV4 (AJ272108)                                    | 74.6                    | 73.1 | 78.9 | 81.4 | 84.7                    | 88.5 | 71.9 |
| Wild boar HEV novel unclassified genotype          |                         |      |      |      |                         |      |      |
| JBOAR135-Shiz09 (AB573435)                         | 74.8                    | 73.1 | 79.4 | 81.9 | 83.6                    | 90.6 | 70.2 |
| wbJOY_06 (AB602441)                                | 74.0                    | 72.9 | 77.2 | 80.7 | 82.5                    | 88.8 | 68.4 |
| Rat/Ferret HEV                                     |                         |      |      |      |                         |      |      |
| Germany rat HEV (GU345042)                         | 56.5                    | 55.3 | 60.2 | 53.9 | 50.1                    | 55.5 | 27.8 |
| Vietnam rat HEV (JX120573)                         | 56.4                    | 55.3 | 60.1 | 53.9 | 50.8                    | 56.1 | 32.2 |
| Ferret HEV (JN998606)                              | 56.3                    | 54.9 | 60.0 | 52.4 | 50.8                    | 56.7 | 30.3 |
| Bat HEV (JQ001749)                                 | 54.1                    | 53.4 | 56.2 | 45.6 | 43.7                    | 47.2 | 20.9 |
| Avian HEV                                          |                         |      |      |      |                         |      |      |
| Avian HEV genotype 1 (AM943647)*†                  | 52.6                    | 52.2 | 53.4 | 43.1 | 43.2                    | 45.3 | 25.0 |
| Avian HEV genotype 2 (AY535004)                    | 52.8                    | 52.6 | 52.7 | 43.7 | 43.7                    | 45.5 | 25.0 |
| Avian HEV genotype 3 (AM943646)*                   | 52.6                    | 52.2 | 53.2 | 44.9 | 42.9                    | 45.4 | 23.1 |
| Avian HEV novel unclassified genotype (JN997392)*† | 52.1                    | 51.7 | 53.0 | 45.6 | 43.3                    | 45.4 | 26.4 |
| Cutthroat trout HEV (HQ731075)                     | 48.3                    | 49.0 | 46.8 | 34.6 | 27.4                    | 20.3 | 14.6 |

\*Near-complete genome.

†Partial ORF1.

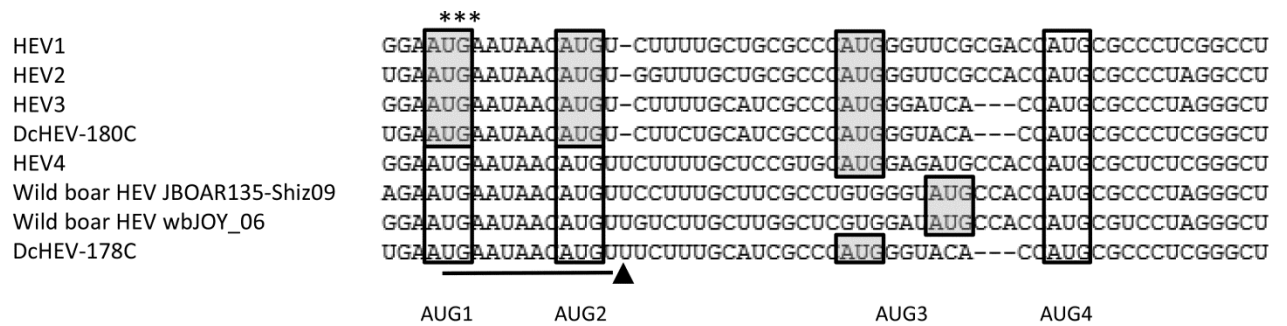

Technical Appendix Figure. Alignment of nucleotide sequences showing potential start codons for ORF2 and ORF3 in DcHEV and other HEVs. Potential start codons of ORF3 are indicated by shaded boxes, and those of ORF2 by open boxes. The inserted U residue is marked with a closed triangle. The stop codon of ORF1 is indicated by asterisks. The conserved *cis*-reactive element with the sequence UGAAUAACAUGU present in HEV1–4 and wild boar HEV is underlined.
